# Supplementary material
Source: PubMed Central journal article supplement (PMC3076838)
Supplement: 1018221108_pnas.201018221SI.pdf [file 1018221108_pnas.201018221SI.pdf]

# Supporting Information

Yau et al. 10.1073/pnas.1018221108

## SI Materials and Methods

**Samples and DNA Sequencing.** Water samples collected from Organic Lake were (i) surface water from the eastern side of the ice-free lake (68° 27' 25.48" S, 78° 11' 28.06" E), December 24, 2006; (ii) a depth profile collected through a 30-cm hold drilled through the surface ice above the deepest point in the lake (68° 27' 22.15" S, 78° 11' 23.95" E), November 10, 2008; and (iii) surface water from the northeast side of the partially ice-covered lake (68° 27' 21.02" S, 78° 11' 42.42" E), December 12, 2008. Samples were sequentially filtered through a 20- $\mu$ m prefilter and biomass captured onto 3.0-, 0.8-, and 0.1- $\mu$ m membrane filters as described previously (1, 2). The samples from 2008 also included 50% (vol/vol) RNAlater. DNA extraction, sequencing, and quality validation was performed as previously described (1, 2). DNA sequencing was performed at the J. Craig Venter Institute in Rockville, MD.

**Transmission Electron Microscopy.** Unfiltered Organic Lake surface water from December 24, 2006 (fixed on site in 1% vol/vol formalin) was concentrated and a solvent exchange performed with sterile filtered ammonium acetate solution 1% (wt/vol) using a 50-kDa cutoff Microcon centrifugal filter device (Millipore) according to the manufacturer's instructions. Formvar-coated 200-mesh copper grids were floated on a droplet of sample for 30 min, excess liquid wicked off, and the grid negatively stained for 30 s with uranyl acetate 2% (wt/vol). The sample was visualized using a JEOL1400 transmission electron microscope (JEOL) at 100 kV at 150,000–250,000 $\times$  magnification.

**Metagenomic Assembly and Annotation.** Mosaic metagenomic assemblies were generated as previously described (1, 2). For the 0.1- $\mu$ m Organic Lake 2006 sample, assembly was a hybrid of Sanger and 454 read data (Table S1). For all other sample size fractions, runtime parameters used were standard for 454 sequencing data. Low-GC ( $\geq 51\%$ ) scaffolds  $>10$  kb from the 0.1- $\mu$ m 2006 assembly had high coverage ( $>45\times$ ), indicating that these were from the dominant taxa. One of these scaffolds was binned as virophage and the rest as phycodnavirus (PV). To further separate the Organic Lake phycodnavirus (OLPV) types and assess the completeness of their genomic content, highly conserved single-copy PV orthologs were identified as follows. An all-against-all BLASTp search was conducted with protein sequences from the 10 available PV genomes (*Acanthocystis turfanea* Chlorella virus 1, PbCV-1, PbCV AR158, PbCV FR483, PbCV NY2A, *Emiliania huxleyi* virus 86, *Ectocarpus siliculosus* virus 1, *Feldmannia* sp. virus, *Ostreococcus* virus 5, and *Ostreococcus tauri* virus 1) and *Acanthamoeba polyphaga* mimivirus (APMV) (which was included as a close PV relative). BLASTp results were parsed and clustered using orthoMCL V1.4 (3, 4). Pairs of each ortholog were located on eight of the PV scaffolds. The location of each ortholog pair had a complementary distribution, so the eight scaffolds were able to be sorted unambiguously into two strains, OLPV-1 and OLPV-2. OLPV-1 ribonucleotide reductase  $\alpha$ -subunit appeared as duplicated on different scaffold ends, likely as an artifact of its proximity to an assembly break point. The remaining high-coverage scaffolds were searched for predicted proteins present in one OLPV strain but not in the other and assigned to the strain in which it was absent. Comparison of OLPV-1 and OLPV-2 scaffolds was performed using tBLASTn of concatenated scaffolds from each strain and visualized using the Artemis Comparison Tool (ACT)

(5). DNA sequence data are available in GenBank and CAMERA (<http://web.camera.calit2.net>).

**Organic Lake Virophage Genome Completion and Annotation.** The high coverage ( $77\times$ ), large number of Sputnik homologs that encode essential functions, and length of the putative Organic Lake virophage (OLV) scaffold from the 0.1- $\mu$ m 2006 hybrid assembly indicated that it was a near-complete genome. Reads from this scaffold were reassembled at high stringency and visualized using Phred/Phrap/Consed (6) to complete the sequence. Mate-pair data indicated a circular molecule, and primers were designed to span the ends of the scaffold and sequence across the gap. Touch-down PCR was performed with eDNA from the 0.1- $\mu$ m 2006 sample, the product used for nested PCR, and the final product was cloned and sequenced. The complete genome was manually annotated and visualized using Artemis (7). Translated ORFs (minimal size 120 aa) were compared (BLASTp) with GenBank, with the all-metagenomic ORF peptide database on CAMERA (<http://web.camera.calit2.net>), and with predicted proteins from OLPV-1 and OLPV-2 scaffolds. Comparisons between the OLV genome and OLPV-1/OLPV-2 were performed with tBLASTn and visualized using ACT (5). Primers used to close the OLV genome were as follows (listed as primer function, name, orientation, sequence 5'-3'): Outer gap spanning primer, SY11, forward, TTG TCT TAT GTA TTA CAA ATC ATT GAA; Outer gap spanning primer, SY12, reverse, CGA CAT TAA TCG GTT GTT TT; Nested gap spanning primer, SY13, forward, GCA TTA CGA ATG TGT TCC AG; Nested gap spanning primer, SY14, reverse, TTC TCC GTG ATT GAT ATC GT; Sequencing primer, SY23, forward, TCC CTA TTG ATG TCA AAA CC; and Sequencing primer, SY24, forward, GAT TCT GGT TGG AGC ATA TAT TT.

**Phylogenetic Analysis.** Translated amino acid sequences from viral marker genes of interest were retrieved from the 0.1- $\mu$ m 2006 metagenomic assemblies from this study, GenBank, and CAMERA all-metagenomic reads ORF peptide database. Homologous sequences were aligned using MUSCLE v3.6 (8). Neighbor-joining analysis, test for clade support (bootstrap analysis, 2,000 replicates), and tree drawing was performed with Molecular Evolutionary Genetics Analysis (MEGA) software v4 (9). Maximum likelihood analysis (JTT substitution model) and test for clade support (aLRT analysis) was performed with PhyML (10) and the tree visualized using MEGA. 18S rRNA gene sequences were retrieved from reads of all filter sizes, compared (BLASTn, e-value  $<1.0e-5$ ) with the SILVA100 SSURef database, aligned, and phylogeny performed using ARB software as previously described (1, 2). The abundance and similarity of virophages in all lake samples and filter sizes was estimated using BLASTp (e-value  $<1.0e-5$ ) to search using the OLV major capsid protein (MCP) sequence against a database of proteins predicted from sequencing reads. The database was generated as previously described (1), and the percentage identity of the BLAST hit was used as a proxy for species similarity.

**Metaproteomic Analysis.** Metaproteomics of proteins from the 0.1- $\mu$ m filter from 2006 was performed as previously described (1, 2), with minor modifications. The protein sequence database was generated by combining ORFs from the 3.0-, 0.8-, and 0.1- $\mu$ m mosaic assemblies with 130,581 sequences in the database. Scaffold 3.0 (version 3\_00\_05; Proteome Software) was used to

validate MS/MS-based peptide and protein identifications. Protein identification data are available in [Table S2](#).

**Model of Algal Host–Virus and Virophage Dynamics.** To model the effect a virophage would have on algal *Pyramimonas* algal host populations in Organic Lake, modified Lotka–Volterra equations were used describing the OLV as a predator of predator OLPV. The original equations are given by:

$$\frac{dA}{dt} = \alpha A - \varepsilon PA \quad [S1]$$

$$\frac{dP}{dt} = \theta PA - \mu P, \quad [S2]$$

where  $A$  is the number of *Pyramimonas* (prey),  $P$  is the number of OLPV (predator),  $\alpha$  and  $\theta$  are the specific growth and production rates of the prey and predator, respectively,  $\varepsilon$  is the rate of predator-mediated death of prey and  $\mu$  is the specific decay rate of the predator. [Eq. S1](#) describes the change in *Pyramimonas* abundance and [Eq. S2](#) the change in OLPV abundance in the absence of OLV. In the presence of OLV,

*Pyramimonas*, OLPV and OLV dynamics are described by the following equations:

$$\frac{dP}{dt} = \theta PA - \mu P - \omega PV \quad [S3]$$

$$\frac{dV}{dt} = \beta PV - \gamma V, \quad [S4]$$

where  $V$  is the number of OLV (predator of predator),  $\omega$  the rate of OLV mediated reduction in OLPV infective particles, and  $\beta$  and  $\gamma$  the production and decay rates of OLV, respectively. [Eq. S3](#) is a modified version of [Eq. S2](#), which includes the effect of OLV on the change in abundance of OLPV. [Eq. S4](#) describes the growth properties of OLV as a predator of OLPV. Values for the variables for the solution shown (Fig. 4, main text) were as follows: initial prey (10), predator (1), and predator of predator (10) numbers,  $\alpha = 0.1$ ,  $\theta = 0.015$ ,  $\varepsilon = 0.01$ ,  $\mu = 0.05$ ,  $\omega = 0.01$ ,  $\beta = 0.015$ , and  $\gamma = 0.15$ . Complex Pathway Simulator (COPASI) software (11) was used to simulate prey, predator, and predator of predator dynamics using the deterministic (LSODA) method.

1. Lauro FM, et al. (2010) An integrative study of a meromictic lake ecosystem in Antarctica. *ISME J*, 10.1038/ismej.2010.185.
2. Ng C, et al. (2010) Metaproteogenomic analysis of a dominant green sulfur bacterium from Ace Lake, Antarctica. *ISME J* 4:1002–1019.
3. Li L, Jr., Stoeckert CJ, Jr., Roos DS (2003) OrthoMCL: Identification of ortholog groups for eukaryotic genomes. *Genome Res* 13:2178–2189.
4. Chen F, Mackey AJ, Jr., Stoeckert CJ, Jr., Roos DS (2006) OrthoMCL-DB: Querying a comprehensive multi-species collection of ortholog groups. *Nucleic Acids Res* 34 (Database issue):D363–D368.
5. Carver TJ, et al. (2005) ACT: The Artemis comparison tool. *Bioinformatics* 21:3422–3423.
6. Gordon D (2004) Viewing and editing assembled sequences using Consed. *Current Protocols in Bioinformatics*, eds Baxeavanis AD, Davison DB (John Wiley & Sons, New York), Sections 11.2.1–11.2.43.
7. Rutherford K, et al. (2000) Artemis: Sequence visualization and annotation. *Bioinformatics* 16:944–945.
8. Edgar RC (2004) MUSCLE: Multiple sequence alignment with high accuracy and high throughput. *Nucleic Acids Res* 32:1792–1797.
9. Kumar S, Nei M, Dudley J, Tamura K (2008) MEGA: A biologist-centric software for evolutionary analysis of DNA and protein sequences. *Brief Bioinform* 9:299–306.
10. Guindon S, Gascuel O (2003) A simple, fast, and accurate algorithm to estimate large phylogenies by maximum likelihood. *Syst Biol* 52:696–704.
11. Hoops S, et al. (2006) COPASI—a Complex Pathway Simulator. *Bioinformatics* 22: 3067–3074.

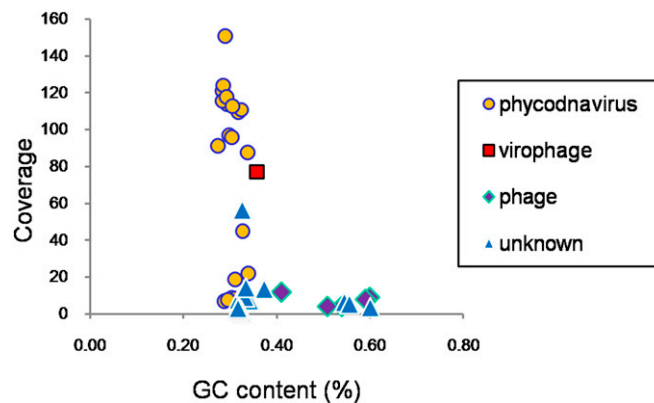

**Fig. S1.** Plot of GC% vs. coverage for the 2006 Organic Lake 0.1- $\mu$ m hybrid assembly scaffolds >10 kb in size.



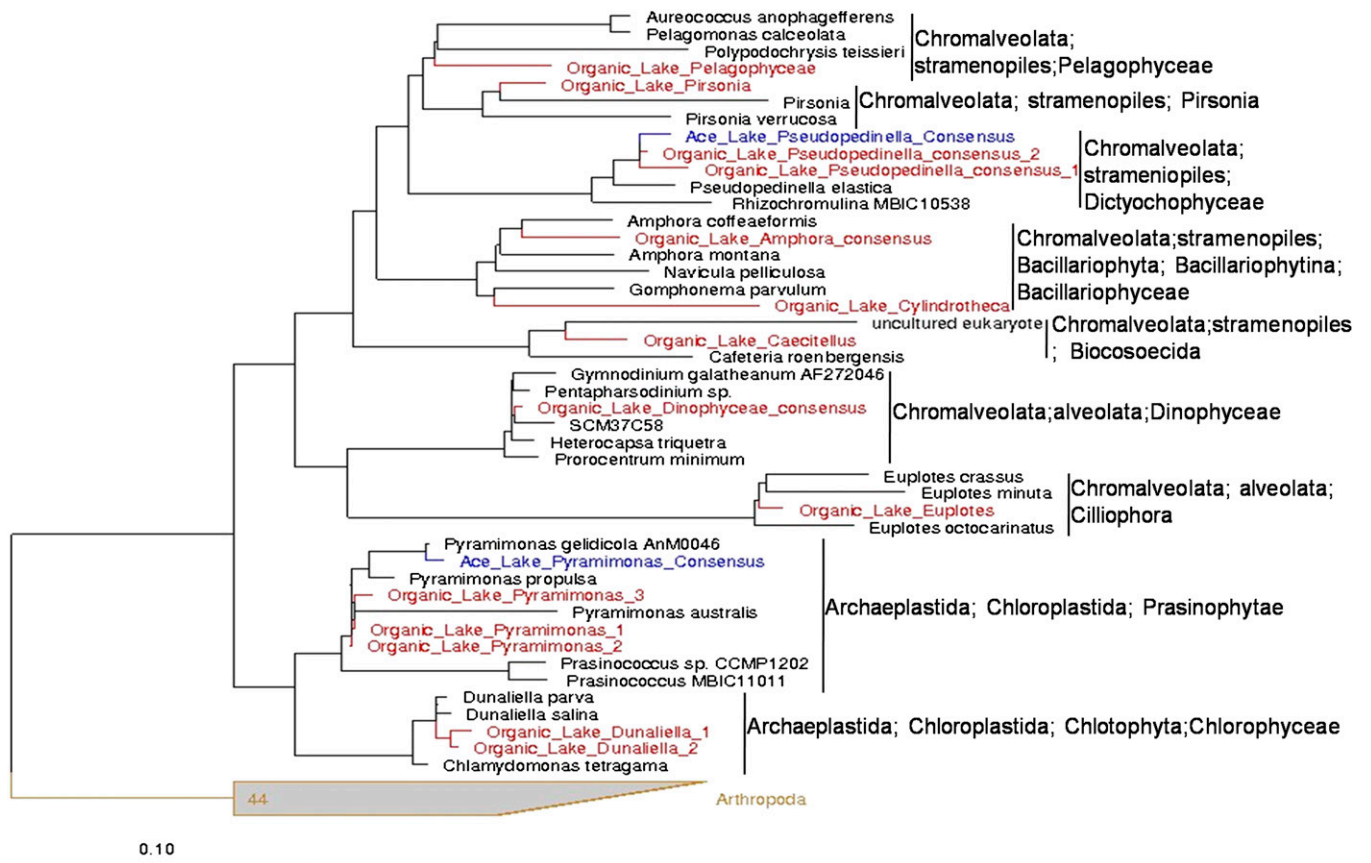

Fig. S3. Phylogeny of the 18S rRNA genes from the 2006 Organic Lake data.





Table S2. Peptide data for Organic Lake metaproteomics: OLPV and OLV proteins from the 2006 Organic Lake 0.1- $\mu$ m filter sample

| Gene ID                | Source   | Normalized spectral abundance | GenBank accession no. | Description                                                                           | Coverage (%) | No. peptides (unique) | Peptide sequences                                                                                                                                                                                                                                                                                            |
|------------------------|----------|-------------------------------|-----------------------|---------------------------------------------------------------------------------------|--------------|-----------------------|--------------------------------------------------------------------------------------------------------------------------------------------------------------------------------------------------------------------------------------------------------------------------------------------------------------|
| 162322530*             | OLPV-1   | 0.000661                      | A7U6F0                | Major capsid protein [ <i>Phaeocystis pouchetii</i> virus]                            | 33.0         | 15 (4)                | R.AIDECLWAVSSLSPESSADVK.V<br>K.ALGAQPFNYTDAVDALPNSIK.A<br>R.EGTYFDQVQPFQHHTR.Y<br>R.HSNFAMESIEQTFNGQADFGR.R<br>K.HYGDWWMQIWCQLTLDK.N<br>R.IDNATLQLVLSNATVEGTNTAK.V<br>R.IMSGMGGLAYSN<br>K.INLCLR.A<br>R.LNFNHPCK.E<br>K.LQLNGQDR.F<br>R.NGDLAYR.T<br>R.NYNVLR.I<br>R.QVCAPR.N<br>R.RVNCTISR.N<br>R.VNCTISR.N |
| 162322348              | OLPV-1   | 0.000120                      | —                     | —                                                                                     | 11.3         | 2 (2)                 | K.GNVDVYQENK.L<br>K.IESDAEPSWVR.G                                                                                                                                                                                                                                                                            |
| 162322406 <sup>†</sup> | OLPV-1   | 0.000177                      | —                     | —                                                                                     | 29.4         | 4 (4)                 | R.QNQSCGGVNVQVNGTHVNR.T<br>R.TAFHLGDGLSR.Q<br>K.TNDGTLVGK.S<br>K.YVSESSTYTR.F                                                                                                                                                                                                                                |
| 162313481              | OLPV-1   | 0.000010                      | YP_002714448          | Leucine rich repeat-containing Miro-like protein [ <i>Synechococcus</i> sp. PCC 7335] | 3.96         | 2 (2)                 | K.IITIPENIGQLVK.I<br>R.SNLQGVTEEQMLMSNK.I                                                                                                                                                                                                                                                                    |
| 162276060              | OLPV-2   | 0.000897                      | —                     | —                                                                                     | 28.9         | 2 (2)                 | K.TPTGLEFSLTGR.A<br>R.VNHTDACSTGNK.E                                                                                                                                                                                                                                                                         |
| 162300260              | OLPV-2   | 0.000226                      | —                     | —                                                                                     | 34.6         | 2 (2)                 | R.VDIEGGTPFFLK.E<br>K.YTFQPELSNTYFSK.E                                                                                                                                                                                                                                                                       |
| 162276024 <sup>†</sup> | OLPV-2   | 0.000127                      | —                     | —                                                                                     | 16.0         | 3 (3)                 | K.LGGGISSR.S<br>R.SEVGFQSTMVGSVDVAMQR.K<br>R.TSLHMGDVLRS.K                                                                                                                                                                                                                                                   |
| 162275992              | OLPV-2   | 0.000098                      | NP_048709             | Hypothetical protein PBCV1_A352L [ <i>Paramecium bursaria</i> Chlorella virus 1]      | 16.6         | 2 (2)                 | K.NINLLSAGANYGINTVGSRLR.N<br>R.NPNLQIR.S                                                                                                                                                                                                                                                                     |
| 162300108              | OLPV-2   | 0.000046                      | ZP_01471812           | BNR containing hypothetical protein RS9916_28494 [ <i>Synechococcus</i> sp. RS9916]   | 7.66         | 5 (5)                 | K.NDNIITLLDTK.Q<br>K.NVVINSEGTIISAVNNK.G<br>K.QDVIDTQTNLNVGR.L<br>K.YENGSWNTLGLQIR.G<br>R.LTVNNSIISK.E                                                                                                                                                                                                       |
| 162319393*             | OLPV-2   | 0.000016                      | A7U6F0                | MCP [ <i>Phaeocystis pouchetii</i> virus]                                             | 26.3         | 13 (2)                | R.AIDECLWAVNTLSPDSSSDVK.V<br>K.ALGAQPFNYTDAIDALPNSVK.A<br>R.EGTYFDQVQPFQHHTR.S<br>R.IDNATLQLVLSNATVEGTNTAK.V<br>R.IMSGMGGLAYSN<br>K.INLCLR.A<br>R.LNFNHPCK.E<br>K.LQLNGQDR.F<br>R.NGDLAYR.T<br>R.NYNVLR.I<br>R.QVCAPR.N<br>R.RVNCTISR.N<br>R.VNCTISR.N                                                       |
| 162300134 <sup>‡</sup> | OLPV-1/2 | 0.000100                      | AAR21578              | Heat shock protein 70 [ <i>Phytophthora nicotianae</i> ]                              | 6.97         | 3 (3)                 | K.ATAGDTHLGGEDFDNR.M<br>R.IINEPTAAAIAYGLDK.K<br>R.VEIIANDQGNR.T                                                                                                                                                                                                                                              |
| 162286324 <sup>‡</sup> | OLPV     | 0.000176                      | NP_048575             | Hypothetical protein PBCV1_A227L [ <i>Paramecium bursaria</i> Chlorella virus 1]      | 14.7         | 2 (2)                 | K.DVPLVANFSAK.F<br>K.MKLENTVEK.M                                                                                                                                                                                                                                                                             |





**Table S3. Top BLASTp matches of predicted coding sequences from the OLV genome compared with the OLPV, GenBank nonredundant (NR) protein database, and CAMERA metagenomic reads ORF peptide database**

| Gene ID | Start | End   | GenBank NR match<br>(accession no./% aa<br>identity/e-value)                                                                                                                                                                                        | OLPV match (gene ID/%<br>aa identity/e-value)                          | Metagenomic ORF peptide<br>match sample, location<br>(accession no./% aa<br>identity/e-value) |
|---------|-------|-------|-----------------------------------------------------------------------------------------------------------------------------------------------------------------------------------------------------------------------------------------------------|------------------------------------------------------------------------|-----------------------------------------------------------------------------------------------|
| OLV1    | 460   | 1077  | —                                                                                                                                                                                                                                                   | —                                                                      | GS003, 0.1, North American East Coast, 1m<br>(JCVI_PEP_1105157870626/41%/1e-29)               |
| OLV2    | 1701  | 1333  | hypothetical protein<br>[ <i>Tetrahymena thermophila</i> SB210]<br>(XP_001029204.1/38%/3e-04)                                                                                                                                                       | —                                                                      | GS012, 0.1, North American East Coast, 13.2m<br>(JCVI_PEP_1105080106223/42%/1.7e-11)          |
| OLV3    | 3187  | 2030  | —                                                                                                                                                                                                                                                   | —                                                                      | —                                                                                             |
| OLV4    | 3991  | 3224  | V3 [Sputnik virophage]<br>(YP_002122364.1/39%/4e-24)                                                                                                                                                                                                | —                                                                      | GS001b, 0.8, Sargasso Sea, 5m<br>(JCVI_PEP_1105131296011/43%/5e-38)                           |
| OLV5    | 5029  | 4160  | V21 [Sputnik virophage]<br>(YP_002122382.1/42%/4.3e-02)                                                                                                                                                                                             | —                                                                      | GS020, 0.1, Panama Canal, 2m<br>(JCVI_PEP_1105125932065/25%/6e-12)                            |
| OLV6    | 5940  | 5044  | —                                                                                                                                                                                                                                                   | —                                                                      | GS000c, 0.22, Sargasso Sea, 5m<br>(JCVI_PEP_1105136847382/24%/6e-3)                           |
| OLV7    | 5978  | 6547  | V9 [Sputnik virophage]<br>(YP_002122370.1/35%/3e-14)                                                                                                                                                                                                | —                                                                      | GS020, 0.1, Panama Canal, 2m<br>(JCVI_PEP_1105140820785/26%/1e-12)                            |
| OLV8    | 6574  | 7740  | N-term: V18 [Sputnik virophage]<br>(YP_002122379.1/27%/9e-05)<br>C-term: V19 [Sputnik virophage]<br>(YP_002122380.1/26%/0.16)                                                                                                                       | —                                                                      | GS008, 0.1, North American East Coast, 1m<br>(JCVI_PEP_1105124194533/32%/6e-8)                |
| OLV9    | 7791  | 9518  | V20 [Sputnik virophage]<br>(YP_002122381.1/28%/9e-10)                                                                                                                                                                                               | —                                                                      | GS033, 0.1, Galapagos Islands, 0.2m<br>(JCVI_PEP_1105120114513/28%/2e-14)                     |
| OLV10   | 9563  | 10273 | —                                                                                                                                                                                                                                                   | —                                                                      | GS001b, 0.8, Sargasso Sea, 5m<br>(JCVI_PEP_1105163928413/61%/5e-4)                            |
| OLV11   | 11210 | 10317 | —                                                                                                                                                                                                                                                   | —                                                                      | GS013, 0.1, North America East<br>Coast, 2.1m (JCVI_PEP_1105123792445/<br>39%/9e-37)          |
| OLV12   | 11284 | 12324 | N terminus: hypothetical protein<br>ATCV_Z547R [ <i>Acanthocystis</i><br><i>turfacea</i> Chlorella virus 1]<br>(YP_001427028.1/36%/7e-09),<br>C terminus: Lipase class 3<br>[ <i>Bacillus thuringiensis</i> IBL 200]<br>(gblEEM96541.1/27%/1.7e-02) | —                                                                      | GS018, Carribean Sea, 1.7m<br>(JCVI_PEP_1105087988121/34%/5.6e-23)                            |
| OLV13   | 12539 | 14884 | collagen-like protein [ <i>Bacillus</i><br><i>megaterium</i> ] (YP_001569009.1/<br>66.67%/4e-03)                                                                                                                                                    | —                                                                      | GS027, 0.1, Galapagos Islands, 2.2m<br>(JCVI_PEP_1105075498120/43%/6.7e-11)                   |
| OLV14   | 14023 | 12905 | —                                                                                                                                                                                                                                                   | —                                                                      | —                                                                                             |
| OLV15   | 13041 | 14078 | —                                                                                                                                                                                                                                                   | —                                                                      | —                                                                                             |
| OLV16   | 14151 | 13372 | —                                                                                                                                                                                                                                                   | —                                                                      | GS020, 0.1, Panama Canal, 2m<br>(JCVI_PEP_1105127133835/36%/8.5e-11)                          |
| OLV17   | 15094 | 16023 | putative transmembrane<br>protein [Flavobacteria<br>bacterium BAL38]<br>(ZP_01734433.1/51%/8e-34)                                                                                                                                                   | OLPV Lipoprotein<br>Q-like protein<br>(162322444/40%/1e-24)            | GS009, 0.1, North American East Coast, 1m<br>(JCVI_PEP_1105137954859/50%/4e-37)               |
| OLV18   | 16054 | 17211 | hypothetical protein<br>BH13620 [ <i>Bartonella</i><br><i>henselae</i> str. Houston-1]<br>(YP_034083.1/15%/4e-04)                                                                                                                                   | OLPV Cyanothecce sp.<br>cce_0037-like protein<br>(162322244/65%/2e-33) | GS000c, 0.1, Carribean Sea, 2m<br>(JCVI_PEP_1105149563549/39%/2e-26)                          |
| OLV19   | 17168 | 20278 | Phage tail fiber repeat<br>family protein [ <i>Trichomonas</i><br><i>vaginalis</i> G3] (XP_001296018.1/<br>42%/4e-11)                                                                                                                               | OLPV Lipoprotein Q-like<br>protein<br>(162322444/65%/9e-33)            | GS016, 0.1, Carribean Sea, 2m<br>(JCVI_PEP_1105149563549/29%/1e-27)                           |
| OLV20   | 20266 | 21570 | collagen triple helix<br>containing protein<br>A1Q_3499 [ <i>Vibrio</i><br><i>harveyi</i> HY01] (ZP_01986098.1/<br>69%/6e-04)                                                                                                                       | OLPV hypothetical protein<br>(162322252/32%/1e-07)                     | GS033, 0.1, Galapagos Islands, 0.2m<br>(JCVI_PEP_1105153074955/69%/1e-5)                      |
| OLV21   | 21089 | 20622 | —                                                                                                                                                                                                                                                   | —                                                                      | —                                                                                             |
| OLV22   | 21747 | 22157 | —                                                                                                                                                                                                                                                   | OLPV hypothetical protein<br>(162322266/56%/5e-31)                     | GS017, 0.1, Carribean Sea, 2m<br>(JCVI_PEP_1105100448171/43%/4e-24)                           |



**Table S4. BLASTp matches for OLV MCP in predicted ORFs of Organic Lake and Ace Lake contigs and CAMERA metagenomic reads ORF peptide database**

| Sample                                                     | Filter size (μm) | Gene ID                | Contig ID        | Identity (%) | Alignment length (aa) | e-value | Contig coverage (x) |
|------------------------------------------------------------|------------------|------------------------|------------------|--------------|-----------------------|---------|---------------------|
| Organic Lake                                               | 0.1              | OLV9                   | —                | —            | —                     | —       | 77.12               |
| December 2006                                              | 0.8              | 176157210              | scf7180000034275 | 98.61        | 575                   | 0.0     | 16.03               |
|                                                            | 3.0              | 181703798              | deg7180000108904 | 98.96        | 575                   | 0.0     | 48.65               |
|                                                            | 0.1              | 192841413              | deg7180000116398 | 99.64        | 555                   | 0.0     | 13.71               |
| Organic Lake<br>November 2008                              | 0.8              | 193037024              | scf7180000086663 | 93.98        | 133                   | 2e-61   | 2.50                |
|                                                            | 3.0              | 192638971              | deg7180000028400 | 99.36        | 156                   | 1e-76   | 1.86                |
|                                                            |                  | 192955191              | deg7180000024244 | 93.98        | 133                   | 1e-61   | 3.10                |
| Organic Lake<br>December 2008                              | 0.1              | 192709908              | scf7180000109753 | 99.01        | 304                   | 9e-173  | 4.38                |
|                                                            |                  | 192709920              | scf7180000109753 | 99.59        | 244                   | 1e-120  | 4.38                |
|                                                            |                  | 192712009              | deg7180000067104 | 54.70        | 117                   | 3e-30   | 1.58                |
|                                                            |                  | 192890551              | deg7180000061276 | 36.89        | 122                   | 2e-13   | 3.15                |
|                                                            |                  | 193060302              | deg7180000053149 | 53.75        | 160                   | 6e-43   | 2.30                |
| Ace Lake 2006                                              | 3.0              | —                      | —                | —            | —                     | —       | —                   |
|                                                            | 0.1              | 167813925              | scf7180000126822 | 28.86        | 246                   | 3e-14   | 2.36                |
|                                                            |                  | 167858124              | scf7180000129064 | 21.78        | 381                   | 5e-10   | 1.94                |
|                                                            |                  | 167891594              | scf7180000136823 | 24.85        | 326                   | 2e-04   | 8.15                |
|                                                            |                  | 167875536              | deg7180000086604 | 22.95        | 244                   | 6e-04   | 2.21                |
|                                                            | 0.8              | 176091445              | deg7180000053588 | 91.61        | 143                   | 8e-78   | 3.35                |
|                                                            |                  | 175769103              | deg7180000078701 | 88.24        | 153                   | 1e-74   | 1.77                |
|                                                            |                  | 176042318              | deg7180000058177 | 81.77        | 181                   | 1e-74   | 2.48                |
|                                                            |                  | 176000635              | deg7180000087166 | 53.39        | 221                   | 8e-58   | 2.50                |
|                                                            |                  | 176042707              | deg7180000058207 | 50.78        | 193                   | 5e-46   | 2.34                |
|                                                            |                  | 175886340              | deg7180000074162 | 58.90        | 146                   | 4e-45   | 2.73                |
|                                                            |                  | 176249679              | deg7180000049481 | 61.94        | 155                   | 2e-44   | 2.75                |
|                                                            |                  | 175748439              | deg7180000058552 | 76.79        | 112                   | 2e-35   | 2.39                |
|                                                            |                  | 175637390              | deg7180000058712 | 50.91        | 165                   | 2e-35   | 2.03                |
|                                                            |                  | 176100822              | deg7180000055966 | 53.38        | 133                   | 6e-35   | 1.48                |
|                                                            |                  | 176018109              | deg7180000086684 | 59.68        | 124                   | 4e-27   | 1.66                |
|                                                            |                  | 176000624              | deg7180000087165 | 53.85        | 104                   | 6e-27   | 1.73                |
|                                                            |                  | 175805608              | deg7180000054222 | 48.60        | 107                   | 7e-21   | 1.93                |
|                                                            |                  | 175908895              | deg7180000061971 | 51.91        | 131                   | 4e-20   | 3.27                |
|                                                            |                  | 175821062              | deg7180000080443 | 46.46        | 127                   | 6e-20   | 1.43                |
|                                                            |                  | 176026419              | deg7180000054364 | 52.59        | 116                   | 8e-19   | 1.47                |
|                                                            |                  | 176133336              | scf7180000089989 | 38.36        | 146                   | 3e-12   | 1.51                |
|                                                            |                  | 176018257              | deg7180000086719 | 31.21        | 173                   | 4e-12   | 1.23                |
|                                                            | 176137412        | deg7180000052688       | 29.37            | 126          | 1e-06                 | 2.47    |                     |
|                                                            | 175686880        | scf7180000092161       | 24.00            | 125          | 2e-06                 | 2.98    |                     |
|                                                            | 3.0              | 175741076              | deg7180000030508 | 85.78        | 232                   | 8e-109  | 1.25                |
|                                                            |                  | 175748837              | deg7180000027929 | 55.29        | 170                   | 4e-44   | 1.32                |
| 175751996                                                  |                  | deg7180000037324       | 51.27            | 158          | 5e-41                 | 1.63    |                     |
|                                                            | 175859792        | scf7180000045944       | 30.21            | 288          | 8e-26                 | 2.69    |                     |
| Hypersaline lagoon,<br>Floreana Island,<br>Ecuador (G5033) | 0.1              | JCVI_PEP_1105120114513 | —                | 27.84        | 273                   | 2e-14   | —                   |
|                                                            |                  | JCVI_PEP_1105100621559 | —                | 24.76        | 307                   | 9e-10   | —                   |
|                                                            |                  | JCVI_PEP_1105161421335 | —                | 25.61        | 289                   | 2e-6    | —                   |
| Delaware Bay, NJ,<br>United States (G5011)                 | 0.1              | JCVI_PEP_1105106741177 | —                | 24.62        | 264                   | 6e-14   | —                   |
|                                                            |                  | JCVI_PEP_1105089715877 | —                | 27.16        | 313                   | 1e-17   | —                   |
| Upwelling near<br>Fernandina Island,<br>Ecuador (G5031)    | 0.1              | JCVI_PEP_1105079267881 | —                | 28.23        | 170                   | 8e-11   | —                   |
| Lake Gatun,<br>Panama (G5020)                              | 0.1              | JCVI_PEP_1105119255775 | —                | 26.71        | 149                   | 5e-9    | —                   |

e-value cutoff 1e-5, alignment length &gt;100 aa.
